# Supplementary material for: Predicting geographic location from genetic variation with deep neural networks
Source: eLife. 2020 Jun 8;9:e54507. doi: 10.7554/eLife.54507 (PMC7324158; doi:10.7554/eLife.54507)
Supplement: Supplementary file 1. — Note that while absolute error increases along with dispersal rate, it is roughly constant when expressed in terms of generations of mean dispersal. [file elife-54507-supp1.csv]

Neighborhood\\Size	Expected dispersal\\(map units/gen)	Error (map units)\\\textit{mean (95\% interval)	Error\\(generations)
13	0.45	1.84 (0.259-3.633)	4.09
25	0.63	2.44 (0.388-6.033)	3.87
105	1.29	4.07 (0.685-8.874)	3.16
251	2	6.44 (0.639-14.526)	3.22
565	3	9.70 (0.871-21.146)	3.23
