# Supplementary material for: Predicting geographic location from genetic variation with deep neural networks
Source: eLife. 2020 Jun 8;9:e54507. doi: 10.7554/eLife.54507 (PMC7324158; doi:10.7554/eLife.54507)
Supplement: Supplementary file 2. — Error is in terms of map units for simulated data (total landscape width = 50). [file elife-54507-supp2.csv]

Data	SNPs	method	mean error	median error
Simulation	100	Locator	6.47	5.59
Simulation	100	SPASIBA	5.74	4.04
Simulation	1000	Locator	2.5	2.54
Simulation	1000	SPASIBA	1.88	1.7
Simulation	10000	Locator	1.85	1.68
Simulation	10000	SPASIBA	1.84	1.75
Simulation	100000	Locator	1.72	1.52
Anopheles	100	Locator	564.72	103.07
Anopheles	100	SPASIBA	690.95	243.47
Anopheles	1000	Locator	137.28	42.63
Anopheles	1000	SPASIBA	453.83	302.87
Anopheles	10000	Locator	70.16	9.77
Anopheles	10000	SPASIBA	364.7	250.05
Anopheles	100000	Locator	56.91	7.65
Anopheles	100000	SPASIBA	245.44	216.75
