# Supplementary material for: Predicting geographic location from genetic variation with deep neural networks
Source: eLife. 2020 Jun 8;9:e54507. doi: 10.7554/eLife.54507 (PMC7324158; doi:10.7554/eLife.54507)
Supplement: Supplementary file 3. [file elife-54507-supp3.csv]

Species	kernel peak error (km)	centroid error (km)
	median (90% interval)
Plasmodium falciparum	16.92 (1.357 - 892.751)	218.98 (16.186 - 978.691)
Anopheles gambiae/coluzzii	5.69 (0.52 - 654.66)	36.03 (2.27 - 1579.79)
Homo sapiens	84.97 (4.42 - 2826.33)	452.62 (37.67 - 2178.94)
