# Supplementary figures and images for: Predicting geographic location from genetic variation with deep neural networks
Source: eLife journal article supplement (doi:10.7554/elife.54507), 2020-06-08

Window Size

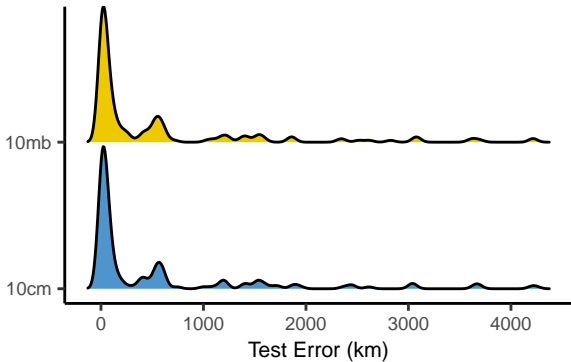

Supplement: supp [file elife-54507-supp-v1.zip]

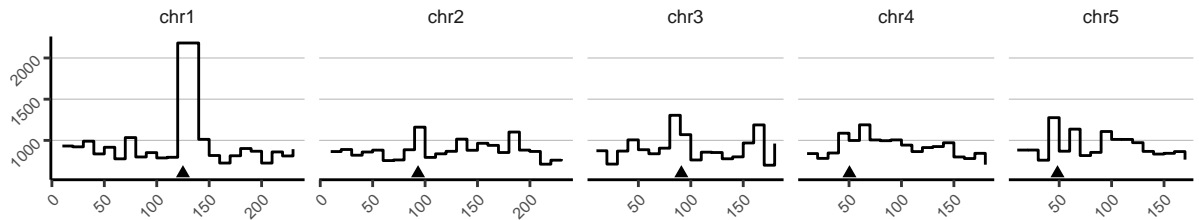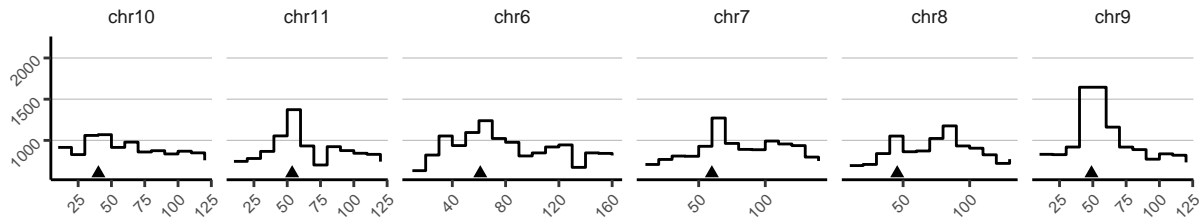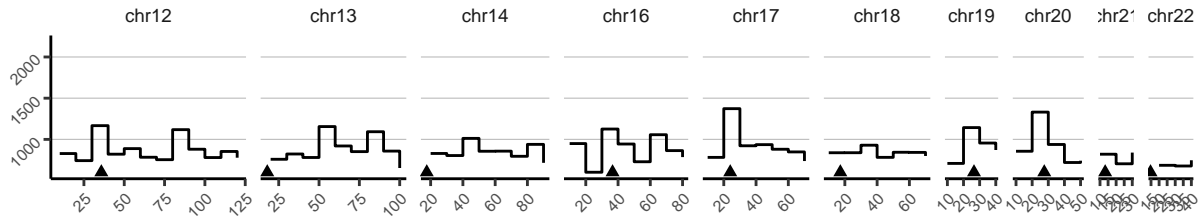

Supplement: supp [file elife-54507-supp-v1.zip]

100 SNPs

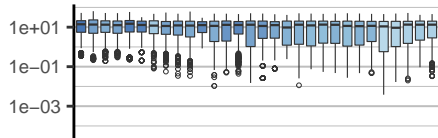

1000 SNPs

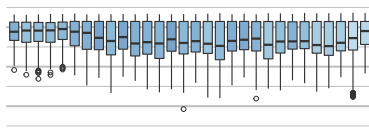

10000 SNPs

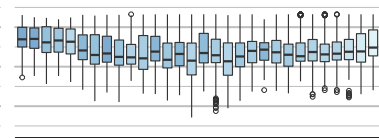

100000 SNPs

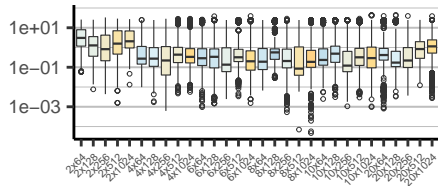

500000 SNPs

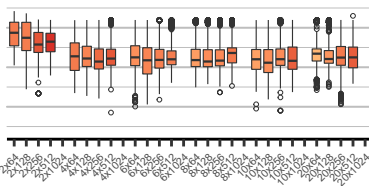

network

Time (m)

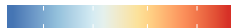

1

3

10

30

Supplement: supp [file elife-54507-supp-v1.zip]

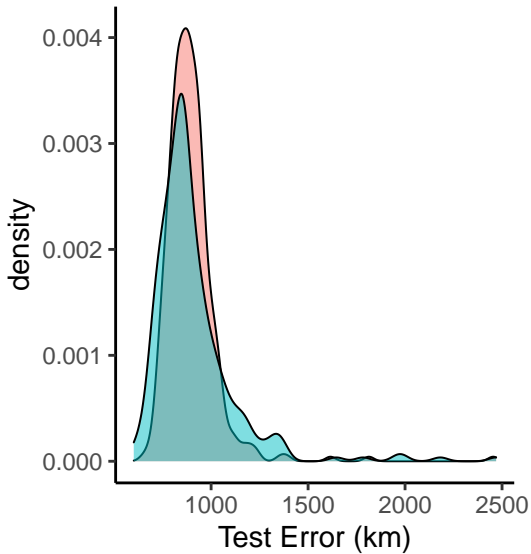

Window Type

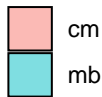

Supplement: supp [file elife-54507-supp-v1.zip]

### Validation

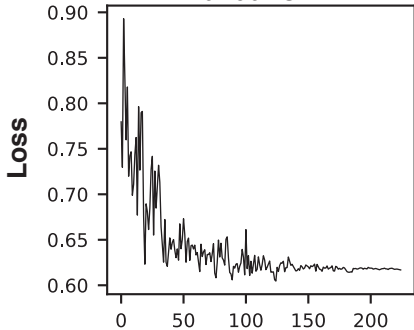

### Training

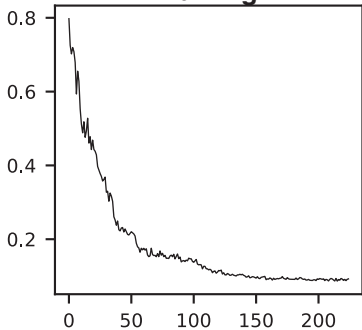

Epoch

Supplement: supp [file elife-54507-supp-v1.zip]

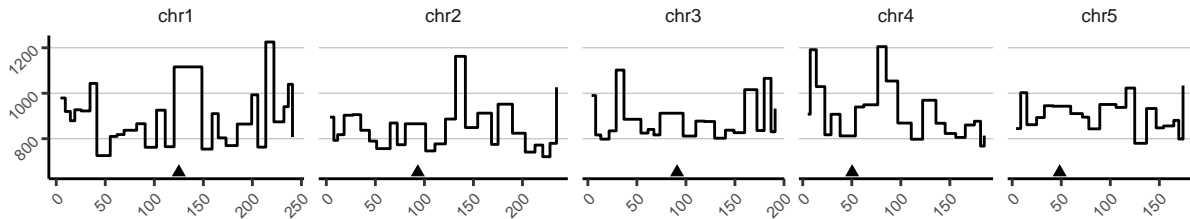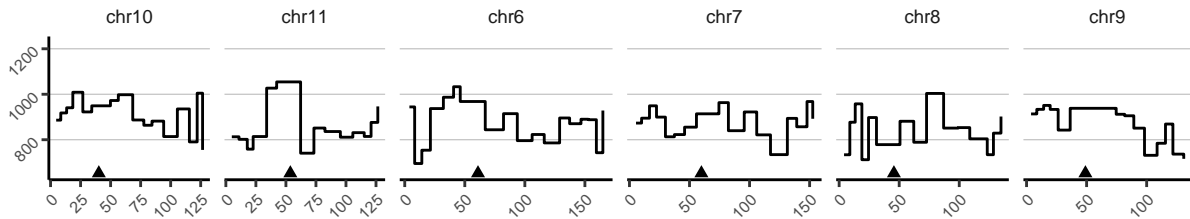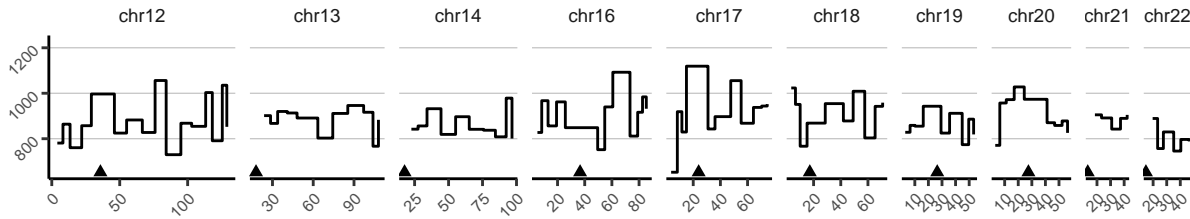

Supplement: supp [file elife-54507-supp-v1.zip]

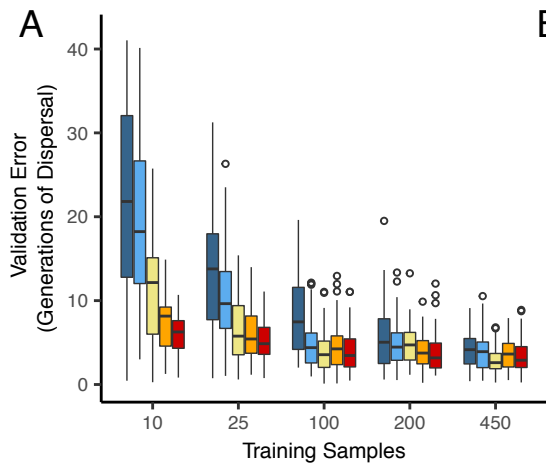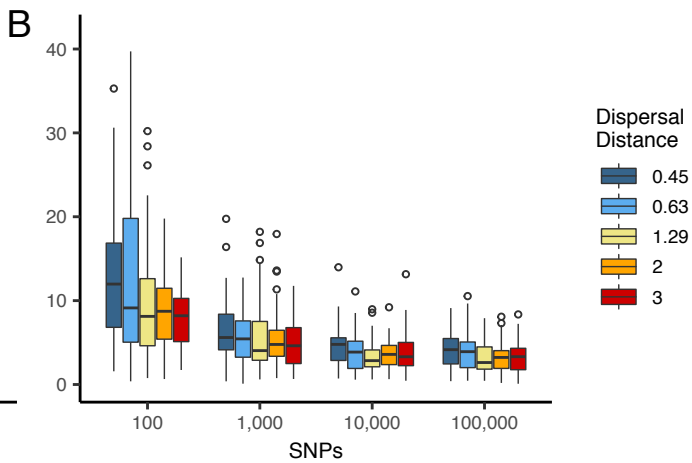

Supplement: supp [file elife-54507-supp-v1.zip]

Locator

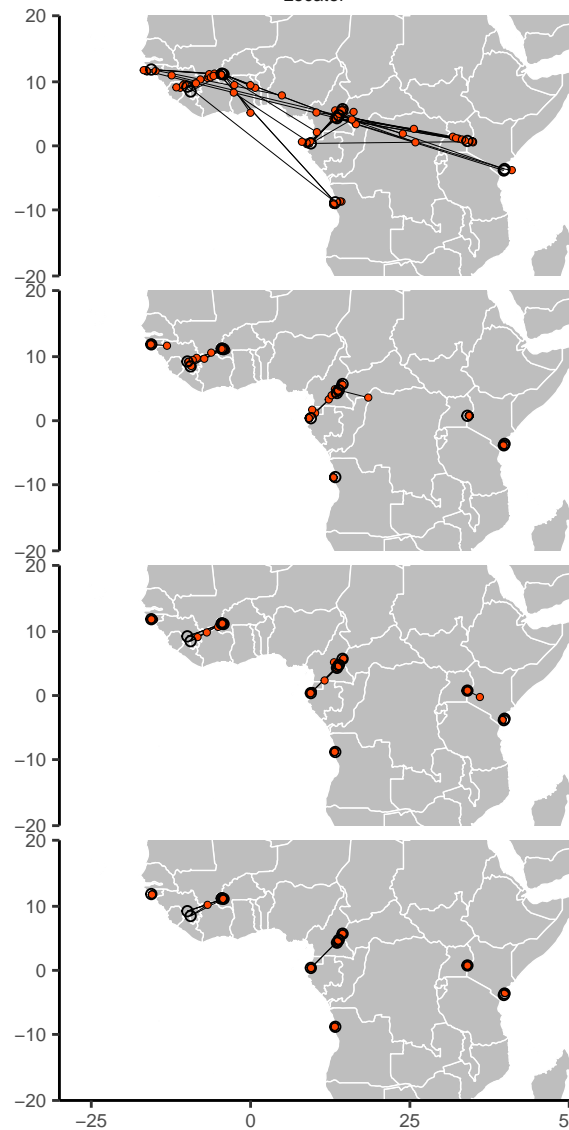

Spasiba

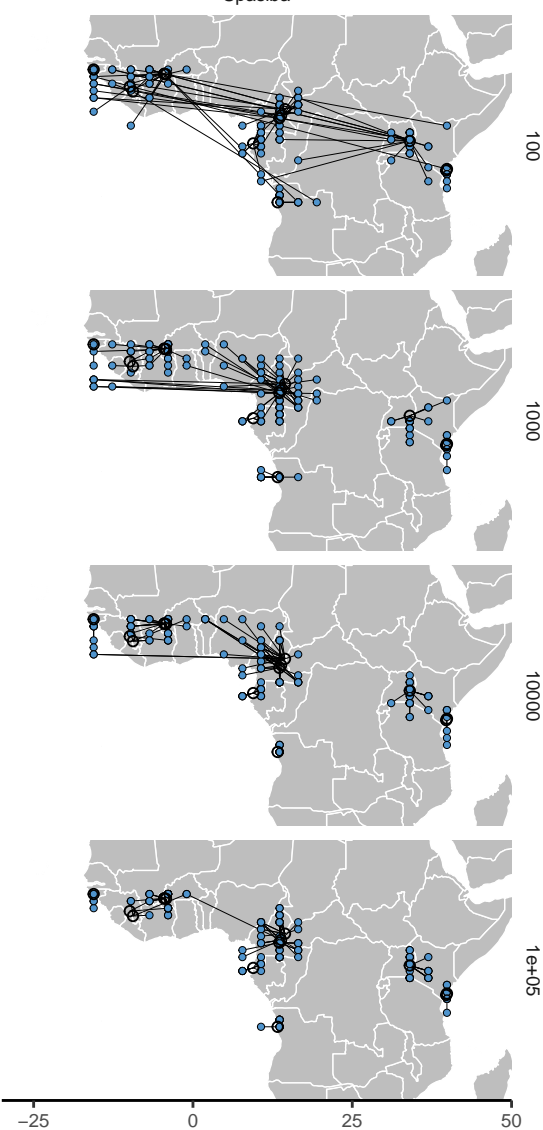

100

1000

10000

1e+05

Supplement: supp [file elife-54507-supp-v1.zip]

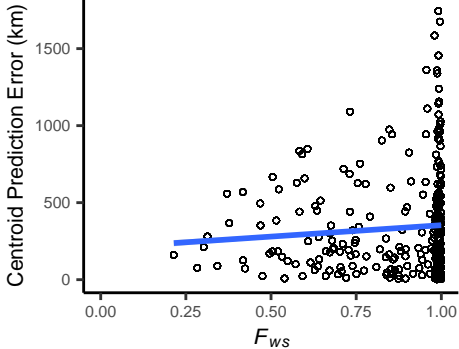

Supplement: supp [file elife-54507-supp-v1.zip]
